**Title: eIF2B extends lifespan through inhibition of the integrated stress response**

**Authors:** Maxime Derisbourg<sup>1†</sup>, Laura Wester<sup>1†</sup>, Ruth Baddi<sup>1</sup>, Martin S. Denzel<sup>1,2,3\*</sup>

**Affiliations:**

<sup>1</sup>Max Planck Institute for Biology of Ageing  
D-50931 Cologne, Germany

<sup>2</sup>CECAD - Cluster of Excellence  
University of Cologne  
D-50931 Cologne, Germany

<sup>3</sup>Center for Molecular Medicine Cologne (CMMC)  
University of Cologne  
D-50931 Cologne, Germany

†These authors contributed equally

\*Corresponding author. Email: [martin.denzel@age.mpg.de](mailto:martin.denzel@age.mpg.de)

1 **Abstract:**

2 Protein homeostasis is modulated by stress response pathways and its deficiency is a  
3 hallmark of aging. The integrated stress response (ISR) is a conserved stress-signaling  
4 pathway that tunes mRNA translation via phosphorylation of the translation initiation  
5 factor eIF2. ISR activation and translation initiation are finely balanced by eIF2 kinases  
6 and by the eIF2 guanine nucleotide exchange factor eIF2B. However, the role of the  
7 ISR during aging remains unexplored. Using a genomic screen in *Caenorhabditis*  
8 *elegans*, we discovered a role of eIF2B and the eIF2 kinases in longevity. By limiting  
9 the ISR, these mutations enhanced protein homeostasis and increased lifespan.  
10 Consistently, full ISR inhibition using phosphorylation-defective eIF2 $\alpha$  or  
11 pharmacological ISR inhibition prolonged lifespan. Lifespan extension through ISR  
12 inhibition occurred without changes in overall protein synthesis, and depended on  
13 enhanced translational efficiency of the kinase KIN-35. Evidently, lifespan is limited by  
14 the ISR and its inhibition may provide an intervention in aging.

15 Aging is defined as the progressive loss of physiological integrity accompanied by  
16 reduced cellular, organ, and systemic performance. It is characterized by cellular  
17 hallmarks such as stem cell exhaustion, genomic instability, deregulated nutrient  
18 sensing and loss of protein homeostasis<sup>1</sup>. Thus, aging is the main risk factor for  
19 neurodegenerative disorders, cancer and metabolic syndrome. The aging process can  
20 be modulated by environmental and genetic factors, and several evolutionary  
21 conserved biological processes have been implicated in lifespan regulation<sup>2</sup>. Failure  
22 of protein homeostasis is an early event during aging and various interventions that  
23 promote or maintain protein homeostasis beneficially affect lifespan in model  
24 organisms<sup>3-5</sup>. During stressful conditions, the maintenance of protein homeostasis by  
25 cellular stress response pathways is an essential feature of cellular integrity and  
26 organismal fitness. Internal and external stimuli trigger evolutionarily conserved  
27 cellular stress pathways such as the heat shock response (HSR), organelle-specific  
28 stress response pathways such as the endoplasmic reticulum or mitochondrial  
29 unfolded protein responses (ER-UPR/mito-UPR) and the Integrated Stress Response  
30 (ISR). Multiple lines of evidence show that longevity ultimately relies on the fidelity of  
31 cellular stress response mechanisms<sup>6</sup>.

32 The biological function of the ISR is to restore cellular homeostasis upon stress. The  
33 activation of the ISR relies on the eukaryotic initiation factor 2 (eIF2) kinases: the  
34 heme-regulated inhibitor (HRI), protein kinase R (PKR), general control  
35 nonderepressible 2 (GCN2), and PKR-like endoplasmic reticulum kinase (PERK).  
36 They are activated, respectively, by iron deficiency, viral infection, amino acid  
37 deprivation and accumulation of misfolded protein in the ER. The kinases converge on  
38 the phosphorylation of the  $\alpha$  subunit of eIF2. eIF2 is a key regulator of translation  
39 initiation, the limiting step of protein synthesis<sup>7</sup>. For translation initiation to occur, the  
40 eIF2.GTP.tRNA<sup>met</sup> ternary complex together with other initiation factors and the 40S  
41 ribosomal subunit forms the 43S pre-initiation complex. The 43S complex binds to the  
42 5'-cap structure and scans along the mRNA until it recognizes the AUG start codon.  
43 Then, GTP hydrolysis releases eIF2 and other initiation factors from the mRNA-40S-  
44 complex, allowing the 60S ribosomal sub-unit to bind and proceed to elongation<sup>8</sup>. The  
45 exchange of GDP to GTP is necessary for recycling of eIF2 back to its active form and  
46 for further rounds of translation initiation. This exchange is catalyzed by the  
47 heterodecameric guanine nucleotide exchange factor eIF2B. The phosphorylation of  
48 eIF2 $\alpha$  at serine 51 by the stress sensitive kinases represents the core event of the ISR.

49 Phospho-eIF2 $\alpha$  is a strong inhibitor of eIF2B leading to attenuated ternary complex  
50 formation and therefore to a reduction of 5'-cap-dependent protein synthesis.  
51 Decreasing the abundance of the ternary complex paradoxically de-represses  
52 translation of specific mRNAs that are regulated by upstream open reading frames  
53 (uORFs) such as *ATF4*, *ATF5*, and *CHOP*. While the ISR and translation initiation are  
54 finely balanced to provide robustness during acute challenges to protein homeostasis,  
55 the role of this pathway during aging and in longevity remains largely unexplored.  
56 Forward genomic screens in *C. elegans* have shed light on numerous pathways whose  
57 activity extend lifespan<sup>9,10</sup>. These approaches used systematic mRNA knockdown, and  
58 did not have the resolution to investigate consequence of other genetic alterations,  
59 including gain-of-function mutations, in longevity. Unbiased forward screens using  
60 chemical mutagenesis coupled with whole genome sequencing are a powerful tool to  
61 reveal new longevity loci. We therefore set out to perform a large-scale mutagenesis  
62 screen for increased survival in *C. elegans*.

## 63 **Results**

### 64 **The ISR is a regulator of longevity and protein homeostasis in *C. elegans*.**

65 To identify novel modulators of the aging process, we optimized an unbiased forward  
66 longevity genetic screen<sup>11,12</sup> (Fig. 1a). The conditionally sterile CF512 strain *fer15(b26)*  
67 *II*; *fem-1(hc17) IV* was mutagenized with 0,3% ethyl methanesulfonate. Of 28000  
68 tested genomes, 318 mutant strains showed increased maximum lifespan and after  
69 full demographic analyses (Fig. 1b), we sequenced 101 genomes of mutants with a  
70 mean lifespan extension of at least 18%. Single-nucleotide polymorphism mapping  
71 revealed potential longevity variants in genes that control eIF2. We found two  
72 independent alleles in *ppp-1/eIF2B $\gamma$* , one mutation in *gcn-2/GCN-2* and one mutation  
73 in *pek-1/PERK* (Fig. 1b, Extended Data Fig. 1a). These results suggest a link between  
74 ISR regulation (Fig. 1d) and *C. elegans* longevity. Outcrossed *ppp-1(wrm10)* and *ppp-*  
75 *1(wrm15)* alleles extended *C. elegans* lifespan by 20% (Fig. 1e and Extended Data  
76 Table 1). Furthermore, CRISPR/Cas9 generated mutants with identical substitutions  
77 confirmed the longevity (Fig. 1f). The outcrossed *gcn-2(wrm4)* and *pek-1(wrm7)*  
78 mutants as well as the *gcn-2(wrm4);pek-1(wrm7)* double mutant were long-lived  
79 (Fig. 1g).

80 We further characterized *ppp-1* mutants using proteotoxic challenges. Upon heat  
81 shock, *ppp-1* mutants showed enhanced survival compared to WT animals (Fig. 1h;  
82 Extended Data Table 2). Expression of fluorescently tagged polyglutamine (polyQ35)  
83 stretches in the muscle<sup>13</sup> results in a drastic decrease of motility (Fig. 1i). Strikingly,  
84 *ppp-1* mutants were protected from polyQ35 toxicity (Fig. 1i). Together, these results  
85 demonstrate that *ppp-1* mutations extend lifespan and protect from proteotoxicity.

### 86 **Gcn(-) mutations extend *C. elegans* lifespan**

87 We used RNAi to investigate the effect of *ppp-1* silencing. *ppp-1* knockdown did not  
88 affect the lifespan of WT animals (Fig. 2a). This was unexpected as silencing eIF2B $\delta$   
89 reduced protein synthesis and extends *C. elegans* lifespan<sup>14</sup>. Instead, *ppp-1* RNAi  
90 abolished longevity and heat resistance of both *ppp-1* mutants (Fig. 2a; Extended Data  
91 Fig. 2a) and heterozygous *ppp-1* mutants were long-lived (Fig. 2b). These  
92 observations suggest that *ppp-1* mutations are genetically dominant. Activation of *ppp-*  
93 *1*, hence of the eIF2B complex, would reduce the ISR upon stress. To test this  
94 hypothesis, we monitored the uORF-regulated translational activation of the worm  
95 homolog of GCN4/ATF4, *atf-5*. While DTT treatment significantly increased reporter  
96 expression in the WT, both *ppp-1* alleles showed a blunted *atf-5* response during stress

97 (Fig. 2c; Extended Data Fig. 2b). The class of general control non-derepressible (Gcn)  
98 mutants in yeast are unable to de-repress the translation of the uORF-regulated  
99 transcription factor GCN4/ATF4 upon amino acid starvation<sup>15</sup>. The inability to  
100 derepress GCN4/ATF4 mimics a state of inactivated ISR. Taken together, the  
101 dominant *ppp-1* mutations show the Gcn(-) phenotype.

102 Next, we tested whether the *gcn-2(wrm4)* and *pek-1(wrm7)* mutants also belong to the  
103 Gcn(-) class. The *gcn-2(wrm4)* mutant displayed a 50% reduction of baseline eIF2 $\alpha$   
104 phosphorylation suggesting that this mutant can be classified as Gcn(-) (Fig. 2d). The  
105 reduction of eIF2 $\alpha$  phosphorylation in the *pek-1(wrm7)* mutant did not reach  
106 significance. To mechanistically address whether Gcn(-) mutations lead to longevity,  
107 we engineered a phospho-defective *eIF2 $\alpha$ S51A* mutant (*eIF2 $\alpha$ (syb1385)*), abolishing  
108 the ISR (Fig. 2e). Homozygous *eIF2 $\alpha$ S51A* mutants were viable and displayed regular  
109 pharyngeal pumping rates (Extended Data Fig. 2c), generation time (Extended Data  
110 Fig. 2d), and brood size (Extended Data Fig. 2e). Importantly, *eIF2 $\alpha$ S51A* mutants  
111 were hypersensitive to ER stress induced by tunicamycin, likely because  
112 phosphorylation of eIF2 $\alpha$  by the *pek-1*/PERK kinase is required to promote the ER  
113 stress response and survival (Fig. 2f). Notably, *eIF2 $\alpha$ S51A* mutants showed a robust  
114 lifespan extension compared to WT animals demonstrating that Gcn(-) mutations lead  
115 to longevity in *C. elegans* and that the genetic inhibition of the ISR can extend lifespan  
116 (Fig. 2g). Consistently, *eIF2 $\alpha$ S51A* mutants were heat resistant (Extended Data  
117 Fig. 2f). Finally, we assessed survival during pharmacological ISR inhibition. For this,  
118 we used a set of compounds that were previously described as UPR modulators in  
119 worms<sup>16</sup>. Estradiol valerate reduced GFP induction of the *atf-5* reporter during  
120 tunicamycin treatment whereas propafenone hydrochloride further elevated GFP  
121 expression (Extended Data Fig. 2g). Consistent with the Gcn(-) phenotype, estradiol  
122 valerate significantly extended *C. elegans* lifespan (Fig. 2h) and suppressed eIF2 $\alpha$   
123 phosphorylation upon DTT treatment (Fig. 2i). Surprisingly, treatments initiated at day  
124 5 or day 10 of adulthood equally increased survival (Fig. 2h) suggesting that late ISR  
125 inhibition might be sufficient to promote lifespan extension. ISR induction with  
126 propafenone hydrochloride shortened lifespan (Extended Data Fig. 2h).

### 127 **Gcn(-) longevity is independent of attenuated translation**

128 As eIF2B is a key regulator of translation initiation, we monitored protein synthesis in  
129 *ppp-1* mutants. First, we measured the levels of incorporated radioactive methionine

130 of day 1 adult animals and did not observe any differences between WT animals and  
131 *ppp-1* mutants (Fig. 3a). To corroborate these results, we used surface sensing of  
132 translation (SUnSET) as an alternative measurement of protein synthesis rates. This  
133 technique is based on the incorporation of puromycin into newly synthesized peptides  
134 followed by the detection of the labelled peptides with monoclonal antibody<sup>17</sup>. No  
135 changes in protein synthesis were observed between *ppp-1* mutants and WT animals  
136 whereas control *rsk-1/S6K* mutants showed a drastic reduction of puromycin-labelled  
137 peptides (Fig. 3b). Finally, we performed polysome profiling to evaluate the distribution  
138 of the ribosomal subunits and complexes after separation on sucrose gradients. We  
139 found no differences in the overall ribosome distribution and abundance (Fig. 3c-d).  
140 Likewise, we found no differences in polysome abundance at day 1 of adulthood  
141 between WT animals and the *eIF2 $\alpha$ S51A* mutant (Fig. 3e-f). Since eIF2 activity is  
142 regulated by phosphorylation, we also evaluated the level of phospho-eIF2 $\alpha$  on day 1  
143 and day 6 of adulthood. We found that the phosphorylation of eIF2 $\alpha$  was increased  
144 upon aging in WT animals (Extended Data Fig. 3a). However, we did not observe any  
145 differences between *ppp-1* mutants or WT control at day 1 or day 6. Together, our  
146 results support the idea that the longevity of *ppp-1* mutants is uncoupled from reduced  
147 protein synthesis.

#### 148 ***kin-35* translation is required for Gcn(-) longevity**

149 As we did not observe any changes in global protein synthesis, we asked whether  
150 translational efficiency of specific mRNAs could be causative for the lifespan extension  
151 of the *ppp-1* animals. We compared the ratio of polysome-associated mRNAs (>3  
152 ribosomes/mRNA) normalized to total mRNA levels between WT and *ppp-1* animals  
153 (Fig. 4a). We found a significant de-enrichment of 336 mRNAs and an enrichment for  
154 72 mRNAs in *ppp-1* polysome fractions (Fig. 4b). GO Term analysis revealed an  
155 enrichment for genes involved in phosphorylation (Fig. 4c).

156 Several studies have demonstrated that translation efficiency of specific mRNAs is a  
157 key regulator of lifespan under different longevity paradigms in *C. elegans*<sup>18,19</sup>.  
158 Therefore, we hypothesized that some of the enriched mRNAs define *ppp-1*  
159 phenotypes. We used resistance to polyQ35 proteotoxicity of *ppp-1* animals as a proxy  
160 for longevity and knocked down the candidate mRNAs in *ppp-1(wrm10)* mutants with  
161 RNAi. At day 8 of adulthood, all polyQ35 transgenic animals were paralyzed.  
162 polyQ35;*ppp-1(wrm10)* animals remained motile and were screened for suppressors  
163 (Fig. 4d). We found seven RNAi clones that abolished the motility of the *ppp-1* mutants

164 by at least 50%. Motility assays quantifying body bending in liquid validated these  
165 results in both *ppp-1* mutant alleles (Fig. 4e). Knockdown of candidate genes C01A2.5  
166 and M04F3.3 showed no motility reduction in WT animals (Extended Data Fig. 4a) but  
167 significantly decreased motility in both *ppp-1* mutants. Lifespan analyses next showed  
168 full suppression of *ppp-1* and *eIF2 $\alpha$ -S51A* longevity (Fig. 4f-g) upon M04F3.3  
169 knockdown. M04F3.3 encodes a predicted kinase with yet unknown function in the  
170 worm that we termed *kin-35*. qPCR analysis confirmed that *kin-35* mRNA association  
171 with polysomes was enhanced in *ppp-1* mutants without increased allover abundance  
172 (Extended Data Fig. 4b). Together, these data suggest that increased translation of  
173 *kin-35* mRNA is required for *ppp-1* longevity. C01A2.5 also significantly reduced *ppp-*  
174 *1* longevity but also shortened WT lifespan suggesting general toxicity (Extended Data  
175 Fig. 4c). Our results demonstrate that selective translation of *kin-35* is required for  
176 lifespan extension and increased protein homeostasis in Gcn(-) mutants.



## 177 **Discussion**

178 Through an unbiased genomic screen for longevity in *C. elegans*, we identified the ISR  
179 as a longevity pathway. We provide evidence that genetic inhibition of the ISR via  
180 Gcn(-) class mutations or via pharmacological treatment extend lifespan. Gcn(-)  
181 mutations attenuate the stress-induced expression of uORF-regulated genes such as  
182 ATF4/GCN4, inhibiting the ISR<sup>15</sup>. Mutations that reduce or abolish eIF2 $\alpha$   
183 phosphorylation, as in the partial *gcn-2* loss-of-function and the eIF2 $\alpha$ -S51A mutants  
184 analysed in this study therefore belong to the Gcn(-) class. We also classified the  
185 dominant eIF2B $\gamma$ /*ppp-1* alleles as Gcn(-) mutations as they reduced uORF regulated  
186 *atf-5* expression under stress. eIF2B subunits have been identified carrying Gcn(-)  
187 mutations in yeast<sup>20</sup>. Upon phosphorylation, eIF2 $\alpha$  inhibits eIF2B<sup>21</sup> and mutations in  
188 eIF2B $\beta$ /GCD7 and eIF2B $\gamma$ /GCD2 render eIF2B insensitive to its inactivation by  
189 phosphorylated eIF2 $\alpha$ <sup>20,22</sup>. These eIF2B variants are protected from inhibition during  
190 the ISR. The eIF2B $\gamma$ /*ppp-1* mutants we found might have similar features regarding  
191 regulation by phosphorylated eIF2 $\alpha$  and thus showed decreased ISR activity. In line  
192 with the lifespan extension, eIF2B and *eIF2 $\alpha$ S51A* mutants displayed improved protein  
193 homeostasis, essential for cellular and organismal health. Reduced mRNA translation  
194 is associated with longevity<sup>23-27</sup>. The long-lived eIF2B and *eIF2 $\alpha$ S51A* mutants showed  
195 maintained translation rates. Hence, longevity did not involve reduced protein  
196 biosynthesis. Instead, translational efficiency of specific mRNAs was altered; selective  
197 translation of the kinase KIN-35 was required for the longevity of Gcn(-) mutants.

### 198 **What is the link between Gcn(-) mutations and lifespan extension?**

199 The regulation of translation initiation and the ISR are intimately linked. Our data  
200 suggest that a shift in the translome, and not the loss of the ISR *per se*, is responsible  
201 for extending lifespan. Long-lived *daf-2*/insulin receptor mutants show changes in their  
202 translome<sup>28</sup> and the extended lifespan of *daf-2;rsks-1/S6K* double mutants is  
203 mediated by the selective translational repression of the cytochrome *cyc-2.1*<sup>18</sup>. Our  
204 study shows that Gcn(-) mutations change translational efficiency of specific mRNAs  
205 that are required for the observed lifespan extension. This is in line with a regulation of  
206 aging at the level of mRNA translation. While it is not understood how *kin-35* mRNA is  
207 selectively recruited to polysomes, our data suggest that upregulation of KIN-35  
208 constitutes a switch that enhances robustness through phosphorylation. This is

209 supported by the analysis of polysome associated mRNAs that points to a broader  
210 change in the cellular dynamics of phosphorylation and dephosphorylation.

211 A number of interventions that extend mouse lifespan show elevated ATF4  
212 expression<sup>29</sup> and ATF4 is linked to lifespan extension via FGF21 in mice<sup>30</sup>.  
213 Additionally, GCN4 is required in yeast to extend lifespan when translation is inhibited  
214 suggesting a beneficial effect of activated ISR for longevity<sup>31</sup>. Further, pharmacological  
215 ISR activation is protective in a Huntingtin mouse model<sup>32</sup>. Nevertheless, deregulated  
216 activation of the ISR has also been correlated with cancer and diabetes<sup>33,34</sup>. The ISR  
217 is activated in neurodegenerative disorders, traumatic brain injury, and Down  
218 syndrome<sup>35-38</sup>. Although the role of the ISR in longevity is thus unclear and is very likely  
219 to differ between cell types, no studies have yet formally tested how direct modulation  
220 of the ISR affects mammalian survival. Our data show that reducing or fully abrogating  
221 the ISR in Gcn(-) mutants extended *C. elegans* lifespan. While the ISR is clearly  
222 required to cope with acute stress, the translational changes in Gcn(-) mutants appear  
223 to support robustness and protein homeostasis.

224 Pathological conditions associated with an increased ISR can be treated by reducing  
225 eIF2 $\alpha$  phosphorylation or by interfering with the inhibition of eIF2B. Deletion of eIF2 $\alpha$   
226 kinases prevents pathology in a mouse model for Alzheimer's disease<sup>35</sup> and PKR  
227 knockout enhances cognitive function in a mouse model for Down syndrome<sup>37</sup>. This  
228 suggests a causal role of the ISR in these age-associated diseases. Further, memory  
229 is enhanced in mice heterozygous for the eIF2 $\alpha$ Ser51Ala mutation<sup>39</sup>. Pharmacological  
230 inhibition of the ISR is possible using the small molecule ISRIB, which enhances  
231 memory, prevents neurodegeneration in prion disease, and reverses memory defects  
232 associated with traumatic brain injury<sup>36,38,40</sup>. Mechanistically, ISRIB stabilizes and  
233 activates eIF2B, which counters the effects of eIF2 $\alpha$  phosphorylation<sup>41,42</sup>. In all, these  
234 data converge with the enhanced survival and robustness we observed in the Gcn(-)  
235 *C. elegans* mutants. Pharmacological inhibition of the ISR might be a promising  
236 therapeutic approach to modulate the ageing process.

## 237 **Methods**

### 238 *C. elegans* strains and culture

239 All *C. elegans* strains were maintained at 20°C on nematode growth medium (NGM)  
240 agar plates seeded with the *Escherichia coli* (*E. coli*) strain OP50, unless indicated  
241 otherwise<sup>43</sup>. To provide an isogenic background in all mutant strains, they were  
242 outcrossed against the wildtype Bristol N2 strain. All strains used in this study are listed  
243 in Extended Data Table 4, including outcrossing information and source. Genotyping  
244 primers used in this study are listed in Extended Data Table 5. The strains *ppp-*  
245 *1(syb728) II* and *ppp-1(syb691) II* were generated by SunyBiotech (China) using  
246 CRISPR/Cas9; the correct sequence was verified by PCR and Sanger sequencing  
247 (Eurofins Genomics, Germany).

### 248 Unbiased forward longevity screen

249 The longevity screen was performed with the temperature sensitive sterile strain  
250 CF512 *fer-15(b26) II; fem-1(hc17) IV*. L4 larvae were exposed to 0,3% ethyl methane  
251 sulfonate (EMS, Sigma) in M9 buffer for 4 h at room temperature. After recovery  
252 overnight, young P0 adult animals were transferred to new plates. Singled F1 progeny  
253 were allowed to lay eggs overnight. In the next generation, singled F2 progeny were  
254 allowed to lay eggs for 16 h. After egg-laying, F2 worms were stocked at 15°C. F3 eggs  
255 were heat shocked at 25°C for 48 h to induce sterility and adult animals were scored  
256 twice a week for preliminary lifespan analysis. Mutants that outlived the non-  
257 mutagenized control by 20% (maximum lifespan) were selected for regular  
258 demographic lifespan analyses to confirm the longevity phenotype. After the lifespan  
259 assays, mutants with a mean lifespan extension above 18% compared to non-  
260 mutagenized CF512 controls were selected for whole genome sequencing.

### 261 Mutant mapping and sequence analysis

262 Genomic DNA of select long-lived strains was prepared using the QIAGEN Genra  
263 Puregene Kit. Whole genome sequencing was conducted on the Illumina HiSeq2000  
264 platform. Paired-end 100 bp reads were used; the average coverage was larger than  
265 16-fold. Sequencing outputs were analyzed using the CloudMap Unmapped Mutant  
266 Workflow pipeline on Galaxy<sup>44</sup>. The WS220/ce10 *C. elegans* assembly was used as  
267 reference genome.

## 268 Lifespan assays

269 Gravid day 1 adults were allowed to lay eggs for 5 h. The offspring was used for  
270 lifespan analysis. The L4 stage was defined as day 0 and more than 100 worms were  
271 used per strain and condition. Worms were kept at 20°C on NGM plates seeded with  
272 OP50 *E. coli* at all times. The animals were transferred every second day to fresh  
273 plates until they reached the post-reproductive stage. Scoring was performed every  
274 second day by monitoring (touch-provoked) movement and pharyngeal pumping.  
275 Animals in all RNAi lifespan assays were treated with RNAi from the young adult stage  
276 on and kept on NGM plates seeded with HT115 *E. coli* bacteria expressing control  
277 *luciferase* or candidate RNAi clones throughout the experiment. Animals in all lifespan  
278 assays on estradiol valerate (Est Val, Sigma) or propafenone hydrochloride (Propa,  
279 Sigma) were transferred at the L4 stage to NGM plates containing 1% DMSO (Sigma)  
280 and 20 µM Est Val/Propa or to control plates with 1% DMSO only. Lifespan assays of  
281 heterozygous animals were performed on F1 hermaphrodites after crossing of mutant  
282 hermaphrodites to wildtype male animals. In all lifespan experiments, worms that had  
283 undergone internal hatching, vulval bursting, or worms crawling off the plates were  
284 censored. Throughout the experiment, strain and/or treatment was unknown to  
285 researchers. Data were assembled on completion of the experiment. Statistical  
286 analyses were performed with the Mantel-Cox log rank method in Prism (Version  
287 8.2.0).

## 288 Thermotolerance assays

289 After an egg-lay, synchronized day 1 animals were transferred to 6 cm NGM plates  
290 containing OP50 and placed at 35°C. Survival was scored for (touch-provoked)  
291 movement and pharyngeal pumping every two hours until no survivors were left.  
292 Worms with internal hatching, vulval bursting, and worms crawling off the plates were  
293 censored. Throughout the experiment, strain and/or treatment was unknown to the  
294 researcher. Unless stated otherwise, at least 3 independent experiments were  
295 performed, error bars represent means  $\pm$ SD and assays were analyzed by two-way  
296 ANOVA, Dunnett's or Sidak's post hoc test as indicated.

## 297 Motility assays in *unc-54P::Q35:YFP* background

298 Animals carrying the *unc-54P::Q35:YFP* (polyQ35) transgene were grown on NGM  
299 plates seeded with OP50. For RNAi experiments, they were transferred at the L4 stage  
300 to plates seeded with HT115 bacteria expressing *luciferase* or candidate RNAi clones.

301 On day 8 of adulthood, motility was tested by transferring single worms to M9, where  
302 they were allowed to acclimatize for 30 sec, followed by the counting of body bends  
303 over 30 sec. At least 12 worms were scored per experiment, genotype and/or  
304 treatment. Throughout the experiment, strain and/or treatment was unknown to the  
305 researcher. Unless stated otherwise, at least 3 independent experiments were  
306 performed, error bars represent means  $\pm$ SD and assays were analyzed by one-way  
307 ANOVA, Dunnett's post hoc test.

### 308 RNAi experiments

309 For RNAi mediated knockdown of specific genes, HT115 bacteria carrying vectors for  
310 dsRNA of the target gene under a promotor inducible by isopropyl  $\beta$ -D-1-  
311 thiogalactopyranoside (IPTG) and an ampicillin resistance were used. Bacteria were  
312 seeded on NGM plates containing 100  $\mu$ g/ $\mu$ L ampicillin (Merck Millipore) and 1 mM  
313 IPTG (Roth). After egg-lay, worms were grown on regular NGM plates seeded with  
314 OP50 bacteria until the L4 stage and then transferred to RNAi plates. RNAi against  
315 *luciferase* was used as nontargeting control. All RNAi clones were obtained from the  
316 Ahringer and Vidal RNAi libraries<sup>45,46</sup>. Clones were validated by plasmid purification  
317 (QIAprep Spin Miniprep Kit, Qiagen) and sequencing using the L4440 seq RV primer.

### 318 Induction of endoplasmic reticulum stress with dithiothreitol

319 Endoplasmic reticulum (ER) stress was induced by incubation of worms in dithiothreitol  
320 (DTT, Sigma). For the DTT treatment, an overnight culture of OP50 bacteria was 10-  
321 fold concentrated in S-basal medium. Worms were transferred into 250  $\mu$ L S-basal  
322 medium, 200  $\mu$ L 10-fold concentrated OP50 and 5  $\mu$ L 1 M DTT diluted in S-basal. The  
323 volume was filled up to a total of 1 mL with S-basal (final DTT concentration: 5 mM).  
324 Worms were incubated for 2 h at 200 rpm.

### 325 Western blotting

326 For Western blotting, day 1 worms were collected in M9 and snap frozen in liquid  
327 nitrogen. For protein extraction, worms were lysed in Ripa buffer (150 mM NaCl, 1%  
328 NP40, 0.5% sodium deoxycholate, 0.1% SDS, 50 mM Tris-HCl, pH 8.0, completed with  
329 protease inhibitors), sonicated and spun down. The supernatant was taken to protein  
330 quantification by bicinchoninic acid assay (Pierce BCA Protein Assay Kit, Thermo  
331 Fisher). Equal amounts of protein were taken to NuPAGE LDS Sample Buffer (4X,  
332 ThermoFisher) containing 50 mM Dithiothreitol (DTT). Proteins were then separated  
333 by reducing SDS-PAGE and transferred to nitrocellulose membranes

334 (Amersham<sup>TM</sup> Hybond ECL), followed by blocking with milk or BSA and antibody  
335 labelling with specific antibodies to phospho-eIF2 $\alpha$  (Ser51) (Cell Signaling), puromycin  
336 (Merck Millipore), Living Colors GFP (Clontech) and  $\alpha$ -tubulin (Sigma).  
337 Immunolabeling was visualized using chemiluminescence kits (ECL, Amersham  
338 Bioscience) on a Chemidoc MP Imaging System (Biorad) and analyzed with the  
339 ImageLab Software (version 5.2, Biorad). Labeling was quantified with Image J  
340 (version 1.51) and Prism (version 8.2.0). For Western blot analyses of compound-  
341 feeding experiments, worms were fed after hatching with 20  $\mu$ M Est Val and 1%  
342 DMSO, or 1% DMSO only. ER stress by DTT was induced as described above. For  
343 Western blot analysis at day 6 of adulthood (and corresponding day 1 control  
344 experiments), worms were transferred to NGM plates containing 10  $\mu$ M 5-Fluoro-2'-  
345 deoxyuridine (Sigma) at the L4 stadium. The collection of the Western blot samples  
346 was conducted at the same time for day 1 and day 6 animals. Unless stated otherwise,  
347 at least 4 independent experiments were performed, error bars represent means  $\pm$   
348 SEM and assays were analyzed by one-way ANOVA, Tukey's or Dunnett's post hoc  
349 test as indicated.

#### 350 Developmental tunicamycin resistance assays

351 For developmental tunicamycin (TM) resistance assays, NGM plates supplemented  
352 with 10  $\mu$ g/mL TM and control plates without TM were used (seeded with OP50  
353 bacteria). 50 to 80 synchronized eggs per genotype and/or condition were added to  
354 the plates. Development to the adult stage was scored after 4 or 5 days. Unless stated  
355 otherwise, at least 4 independent experiments were performed, error bars represent  
356 means  $\pm$ SEM and assays were analyzed by two-way ANOVA, Sidak's post hoc test.

#### 357 <sup>35</sup>S-methionine labelling

358 To monitor translation rates, <sup>35</sup>S-methionine labelling was performed based on Hansen  
359 *et al.*, 2007<sup>25</sup>. OP50 bacteria were cultured overnight in LB medium (1 mL/sample)  
360 containing 15  $\mu$ Ci of <sup>35</sup>S-methionine and concentrated 10-fold. Synchronized day 1  
361 worms were added to the mix and incubated for 3 h at room temperature. Worms were  
362 washed twice with S-basal and incubated in non-radioactive OP50 (10-fold  
363 concentrated). Worms were washed twice with S-basal medium and flash frozen three  
364 times in liquid nitrogen. Worm pellets were boiled in 100  $\mu$ L 1% SDS and centrifuged  
365 2 min at 2000 g to remove cuticles. Supernatants were submitted to trichloroacetic acid  
366 precipitation. Protein pellets were neutralized with 20  $\mu$ L of 0,2 M NaOH. Proteins were

367 solubilized with 180  $\mu$ L of 8 M urea; 4% chaps; 1% DTT. Protein concentrations were  
368 measured using Bradford reagent and  $^{35}$ S radioactivity was measured by liquid  
369 scintillation. Unless stated otherwise, at least 5 independent experiments were  
370 performed, error bars represent means  $\pm$ SEM and assays were analyzed by one-way  
371 ANOVA, Dunnett's post hoc test.

#### 372 Surface sensing of translation (SUnSET), puromycin incorporation

373 To monitor protein synthesis in a non-radioactive manner using puromycin  
374 incorporation and puromycin detection based on Schmidt *et al.*, 2009<sup>17</sup>, day 1 worms  
375 were collected in M9 and once washed into S-basal medium. For the puromycin  
376 treatment, an overnight culture of OP50 bacteria was 10-fold concentrated in S-basal  
377 medium. Worms were then transferred into 250  $\mu$ L S-basal medium, 200  $\mu$ L 10-fold  
378 concentrated OP50 and 50  $\mu$ L 10 mg/mL puromycin diluted in S-basal. The volume  
379 was filled up to a total of 1 mL with S-basal (final puromycin concentration: 0,5 mg/mL).  
380 Worms were incubated for 3 h at 200 rpm. Afterwards, they were washed 3 times in S-  
381 basal and snap-frozen in liquid nitrogen. Worms were kept on ice after the puromycin  
382 treatment. Protein extraction and Western blot using anti-puromycin antibody (Merck  
383 Millipore) was performed as described before.

#### 384 Polysome profiling

385 For the analysis of translation via polysome profiling based on Ding and Großhans,  
386 2009<sup>47</sup>, synchronized gravid day 1 adults were grown on NGM plated seeded with  
387 OP50. Per genotype and replicate, ~12000 worms were harvested and washed twice  
388 with M9, once with M9 supplemented with 1 mM cycloheximide (Sigma) and once with  
389 lysis buffer (20 mM Tris pH 8.5, 140 mM KCl, 1.5 mM MgCl<sub>2</sub>, 0.5% Nonidet P40, 1 mM  
390 DTT, 1 mM cycloheximide). Worms were pelleted and resuspended in 350  $\mu$ L cold  
391 lysis buffer supplemented with 1% sodiumdeoxycholate (DOC, Sigma). Resuspended  
392 worms were lysed using a chilled Dounce homogenizer. Ribonuclease inhibitor RNasin  
393 (Promega) was added to samples used for RNA sequencing or quantitative PCR  
394 (qPCR) at a concentration of 0,4 U/ $\mu$ L. Samples were then mixed and incubated on  
395 ice for 30 min, followed by a centrifugation step (12000 g, 10 min, 4°C) for clearance.  
396 The pellet was discarded and the RNA concentration of the supernatant was estimated  
397 by absorbance measurement at 260 nm.

398 To prepare sucrose gradients, 15% (w/v) and 60% (w/v) sucrose solutions were  
399 prepared in basic lysis buffer (20 mM Tris pH 8.5, 140 mM KCl, 1.5 mM MgCl<sub>2</sub>, 1 mM

400 DTT, 1 mM cycloheximide). Linear sucrose gradients were produced using a Gradient  
401 Master (Biocomp). Equivalent amounts of sample (around 400 µg RNA) were loaded  
402 on the gradient and centrifuged at 39000 g for 3 h at 4°C, using an Optima L-100 XP  
403 Ultracentrifuge (Beckman Coulter) and the SW41Ti rotor. To analyze the sample on  
404 the gradient during fractionation, absorbance at 254 nm was measured and recorded  
405 (Econo UV monitor EM-1, Biorad) using the Gradient Profiler software (version 2.07).  
406 Gradient fractionation was performed from the top down using a Piston Gradient  
407 Fractionator (Biocomp) and a fraction collector (Model 2110, Biorad). Gradients were  
408 fractionated in 20 fractions of equal volume. In an initial experiment, the ribosomal  
409 fractions were validated by analyzing RNA from each fraction via agarose gel  
410 electrophoresis. The 18S and 28S rRNA signals were used as indicators for the 40S  
411 ribosomal subunit, the 60S ribosomal subunit and fully assembled ribosomes.  
412 Quantification of the ribosomal complexes was performed using Image J and  
413 statistically analyzed with Prism. Unless stated otherwise, at least four independent  
414 experiments were performed, error bars represent means ±SD and assays were  
415 analyzed by two-way ANOVA, Dunnett's post hoc test.

416 For more precise analysis of ribosomal fractions, they were collected by hand  
417 according to their absorbance profile; for RNAseq and qPCR analyses, one fraction for  
418 80S ribosomes and one for polysomes (excluding disomes) was collected per sample.  
419 RNA extraction from total lysates and from each fraction was performed using the  
420 Direct-zol RNA MicroPrep Kit (Zymo Research) according to the manufacturer's  
421 recommendations.

#### 422 Polysome sequencing

423 For polysome sequencing, monosome extracts, polysome extracts (without disomes),  
424 and corresponding total RNA were collected as detailed above. cDNA libraries were  
425 generated with ribosomal RNA depletion at the Cologne Center for Genomics and  
426 sequenced on the Illumina HiSeq2000 platform.

427 For data analysis, raw reads from all RNAseq and polysome sequencing replicates  
428 were mapped to the *C. elegans* reference genome (ENSEMBL 91) using HISAT2  
429 (v2.1.0)<sup>48</sup>. After guided transcriptome assembly with StringTie (v1.3.4d),  
430 transcriptomes were merged with Cuffmerge and quantification was performed with  
431 Cuffquant<sup>49</sup>. The analysis for differential gene expression for total, monosomal and  
432 polysomal RNA was performed with Cuffdiff (Cufflinks v2.2.1)<sup>50,51</sup>. To analyze the  
433 translome, the abundance of each mRNA in the polysomal fraction was normalized



434 to its abundance in the total input mRNA. Respective normalized values were used to  
435 identify changes between different conditions using Student's t-test. For further  
436 analyses, we only included the mRNAs that were found significantly changed in both  
437 *ppp-1* mutants. For each mRNA, the mean p-values and the mean log-2 fold change  
438 of both *ppp-1* mutants were used. David analysis was performed to identify significantly  
439 enriched gene ontology terms<sup>52</sup>.

#### 440 Selective RNAi screen for suppressors of *ppp-1* motility

441 Synchronized worms of the *ppp-1(wrm10)* strain crossed to *mLs133[unc-*  
442 *54P::Q35:YFP]* animals (*ppp-1* polyQ35) and control *mLs133[unc-54P::Q35:YFP]*  
443 worms (WT polyQ35) were grown to the L4 larval stadium. Animals were then placed  
444 on NGM plates containing 10  $\mu$ M 5-Fluoro-2'-deoxyuridine (FUDR, Sigma) to inhibit  
445 the development of progeny. Plates were seeded with HT115 bacteria expressing  
446 selected RNAi clones to knock down specific genes in the nematodes. At day 8 of  
447 adulthood, the motility of *ppp-1* polyQ35 as well as WT polyQ35 worms was assessed  
448 on *luciferase* control RNAi and 66 RNAi treatments targeting mRNAs enriched in *ppp-*  
449 *1* polysomes. To test motility, 15 worms were picked into the center of a 10 mm circle  
450 on an unseeded NGM plate and their ability to leave the circle after one minute was  
451 scored. For more reliability, 4 experiments were performed for the control conditions  
452 (WT polyQ35 and *ppp-1* polyQ35 on *luciferase* RNAi; error bars represent means  
453  $\pm$ SD).

454 RNAi treatments rescuing the *ppp-1* polyQ35 motility phenotype to at least 50%  
455 compared to the *ppp-1* polyQ35 control on *luciferase* RNAi were validated by full  
456 motility assays (without usage of FUDR) counting body bends over 30 seconds in  
457 liquid. In a counter screen, the effect of the RNAi treatments on WT polyQ35 animals  
458 was tested. To this end, young worms were treated as described before and the motility  
459 on day 6 of adulthood was scored as described above. If motility of WT polyQ35 worms  
460 treated with RNAi against candidate mRNAs was significantly lower compared to  
461 animals treated with *luciferase* RNAi, candidates were excluded from further analysis.

#### 462 Worm imaging

463 For worm imaging, animals were arranged in stacks on unseeded NGM plates and  
464 kept on ice. Images were taken with a fluorescence microscope (Leica M165FC) and  
465 a camera (Leica DFC 3000G). Images were taken and analyzed with the Leica  
466 Application Suite X (Version 3.4.1.17822), scale bar as indicated in the figures.

#### 467 Compound screen

468 To identify compounds inhibiting the ISR, synchronized *atf-5P::GFP::unc-54* 3'UTR  
469 L4 animals were transferred to NGM plates without or with 4 µg/mL tunicamycin (TM).  
470 Furthermore, plates were supplemented with 1% DMSO (Sigma) as control, or with  
471 1% DMSO and 20 µM estradiol valerate (Sigma), ISRIB (Sigma), GSK2606414  
472 (Calbiochem), propafenone hydrochloride (Sigma), azadirachtin (Sigma) or estriol  
473 (Sigma), respectively. Day 1 animals were analyzed by fluorescent microscopy as  
474 described above.

#### 475 Pharyngeal pumping

476 Pharyngeal pumping rates of synchronized animals were measured at day 1 of  
477 adulthood by counting pharyngeal contractions per worm during 30 sec. Per  
478 experiment and genotype, at least 15 worms were analyzed. Throughout the  
479 experiment, strain and/or treatment was unknown to the researcher. Error bars  
480 represent means ±SD.

#### 481 Generation time

482 For generation time assays, synchronized eggs were allowed to develop to adult  
483 worms on single plates until they laid the first egg, which was defined as generation  
484 time. After 55 h, animals were scored every hour with 15 worms being analyzed per  
485 experiment and genotype. Throughout the experiment, strain and/or treatment was  
486 unknown to the researcher. Error bars represent means ±SD.

#### 487 Brood size assays

488 For brood size assays, synchronized L4 worms were placed on individual NGM plates  
489 seeded with OP50 bacteria. Worms were transferred to fresh plates every 24 h until  
490 no more eggs were laid. The number of viable progenies on each plate was counted  
491 and summed up per individual parental worm. Per experiment, genotype and/or  
492 condition, at least 15 parental worms were analyzed. Error bars represent means ±SD.

#### 493 qRT-PCR (qPCR)

494 For qPCR analyses, day 1 worm samples or indicated samples from ribosome profiling  
495 were collected in TRI Reagent (Zymo) and frozen in liquid nitrogen. RNA extraction  
496 was performed using the Direct-zol RNA MicroPrep Kit (Zymo Research) according to  
497 the manufacturer's recommendations, followed by cDNA synthesis (iScript cDNA  
498 Synthesis Kit, BioRad). qPCRs were performed using Power SYBR Green PCR Master

499 Mix (Applied Biosystems) on a ViiA 7 Real-Time PCR System (Applied Biosystems).  
500 Primers for the gene M04F3.3 / *kin-35* were used (Forward  
501 CGGTTGAATATTGGTGAGGAGGTT; reverse  
502 GCCACCATGATCTCTCTTTCAATCT). Primers for the gene *act-1* were used as  
503 internal control (Forward CTACGAACTTCCTGACGGACAAG; reverse  
504 CCGGCGGACTCCATACC). Unless stated otherwise, at least three independent  
505 experiments were performed, error bars represent means  $\pm$ SEM and assays were  
506 analyzed by two-way ANOVA, Tukey's post hoc test.

### 507 Statistical analysis

508 Unless stated otherwise, results are presented as means  $\pm$ SD or means  $\pm$ SEM.  
509 Unless noted otherwise, statistical tests were performed using one-way or two-way  
510 ANOVA with Sidak's, Dunnet's or Tukey's multiple comparison test. Significance levels  
511 are \* $p < 0.05$ , \*\* $p < 0.01$ , and \*\*\* $p < 0.001$  versus WT control unless otherwise noted.  
512 Experiments were carried out with at least three biological replicates unless noted  
513 otherwise.

## 514 References

- 515 1 Lopez-Otin, C., Blasco, M. A., Partridge, L., Serrano, M. & Kroemer, G. The hallmarks of  
516 aging. *Cell* **153**, 1194-1217, doi:10.1016/j.cell.2013.05.039 (2013).
- 517 2 Riera, C. E., Merkwirth, C., De Magalhaes Filho, C. D. & Dillin, A. Signaling Networks  
518 Determining Life Span. *Annual review of biochemistry* **85**, 35-64, doi:10.1146/annurev-  
519 biochem-060815-014451 (2016).
- 520 3 Ben-Zvi, A., Miller, E. A. & Morimoto, R. I. Collapse of proteostasis represents an early  
521 molecular event in *Caenorhabditis elegans* aging. *Proc Natl Acad Sci U S A* **106**, 14914-  
522 14919, doi:0902882106 [pii]10.1073/pnas.0902882106 (2009).
- 523 4 Denzel, M. S. *et al.* Hexosamine pathway metabolites enhance protein quality control  
524 and prolong life. *Cell* **156**, 1167-1178, doi:10.1016/j.cell.2014.01.061 (2014).
- 525 5 Pyo, J. O. *et al.* Overexpression of Atg5 in mice activates autophagy and extends  
526 lifespan. *Nat Commun* **4**, 2300, doi:10.1038/ncomms3300 (2013).
- 527 6 Kourtis, N. & Tavernarakis, N. Cellular stress response pathways and ageing: intricate  
528 molecular relationships. *The EMBO journal* **30**, 2520-2531,  
529 doi:10.1038/emboj.2011.162 (2011).
- 530 7 Merrick, W. C. & Pavitt, G. D. Protein Synthesis Initiation in Eukaryotic Cells. *Cold Spring*  
531 *Harbor perspectives in biology* **10**, doi:10.1101/cshperspect.a033092 (2018).
- 532 8 Hinnebusch, A. G., Ivanov, I. P. & Sonenberg, N. Translational control by 5'-  
533 untranslated regions of eukaryotic mRNAs. *Science* **352**, 1413-1416,  
534 doi:10.1126/science.aad9868 (2016).
- 535 9 Hamilton, B. *et al.* A systematic RNAi screen for longevity genes in *C. elegans*. *Genes*  
536 *Dev* **19**, 1544-1555, doi:10.1101/gad.1308205 (2005).
- 537 10 Hansen, M., Hsu, A. L., Dillin, A. & Kenyon, C. New genes tied to endocrine, metabolic,  
538 and dietary regulation of lifespan from a *Caenorhabditis elegans* genomic RNAi screen.  
539 *PLoS Genet* **1**, 119-128, doi:10.1371/journal.pgen.0010017 (2005).
- 540 11 Klass, M. R. A method for the isolation of longevity mutants in the nematode  
541 *Caenorhabditis elegans* and initial results. *Mechanisms of ageing and development* **22**,  
542 279-286, doi:10.1016/0047-6374(83)90082-9 (1983).
- 543 12 Friedman, D. B. & Johnson, T. E. Three mutants that extend both mean and maximum  
544 life span of the nematode, *Caenorhabditis elegans*, define the age-1 gene. *Journal of*  
545 *gerontology* **43**, B102-109, doi:10.1093/geronj/43.4.b102 (1988).
- 546 13 Morley, J. F., Brignull, H. R., Weyers, J. J. & Morimoto, R. I. The threshold for  
547 polyglutamine-expansion protein aggregation and cellular toxicity is dynamic and  
548 influenced by aging in *Caenorhabditis elegans*. *Proc Natl Acad Sci U S A* **99**, 10417-  
549 10422, doi:10.1073/pnas.152161099 (2002).
- 550 14 Tohyama, D., Yamaguchi, A. & Yamashita, T. Inhibition of a eukaryotic initiation factor  
551 (eIF2Bdelta/F11A3.2) during adulthood extends lifespan in *Caenorhabditis elegans*.  
552 *FASEB journal : official publication of the Federation of American Societies for*  
553 *Experimental Biology* **22**, 4327-4337, doi:10.1096/fj.08-112953 (2008).
- 554 15 Hinnebusch, A. G. Translational regulation of GCN4 and the general amino acid control  
555 of yeast. *Annual review of microbiology* **59**, 407-450,  
556 doi:10.1146/annurev.micro.59.031805.133833 (2005).
- 557 16 Halliday, M. *et al.* Repurposed drugs targeting eIF2 $\alpha$ -P-mediated translational  
558 repression prevent neurodegeneration in mice. *Brain : a journal of neurology* **140**,  
559 1768-1783, doi:10.1093/brain/awx074 (2017).

- 560 17 Schmidt, E. K., Clavarino, G., Ceppi, M. & Pierre, P. SUnSET, a nonradioactive method  
561 to monitor protein synthesis. *Nature methods* **6**, 275-277, doi:10.1038/nmeth.1314  
562 (2009).
- 563 18 Lan, J. *et al.* Translational Regulation of Non-autonomous Mitochondrial Stress  
564 Response Promotes Longevity. *Cell reports* **28**, 1050-1062.e1056,  
565 doi:10.1016/j.celrep.2019.06.078 (2019).
- 566 19 Rollins, J. A., Shaffer, D., Snow, S. S., Kapahi, P. & Rogers, A. N. Dietary restriction  
567 induces posttranscriptional regulation of longevity genes. *Life science alliance* **2**,  
568 doi:10.26508/lsa.201800281 (2019).
- 569 20 Vazquez de Aldana, C. R. & Hinnebusch, A. G. Mutations in the GCD7 subunit of yeast  
570 guanine nucleotide exchange factor eIF-2B overcome the inhibitory effects of  
571 phosphorylated eIF-2 on translation initiation. *Mol Cell Biol* **14**, 3208-3222,  
572 doi:10.1128/mcb.14.5.3208 (1994).
- 573 21 Kashiwagi, K. *et al.* Structural basis for eIF2B inhibition in integrated stress response.  
574 *Science* **364**, 495-499, doi:10.1126/science.aaw4104 (2019).
- 575 22 Dev, K. *et al.* The beta/Gcd7 subunit of eukaryotic translation initiation factor 2B  
576 (eIF2B), a guanine nucleotide exchange factor, is crucial for binding eIF2 in vivo. *Mol*  
577 *Cell Biol* **30**, 5218-5233, doi:10.1128/mcb.00265-10 (2010).
- 578 23 Syntichaki, P., Troulinaki, K. & Tavernarakis, N. Protein synthesis is a novel determinant  
579 of aging in *Caenorhabditis elegans*. *Ann N Y Acad Sci* **1119**, 289-295,  
580 doi:10.1196/annals.1404.001 (2007).
- 581 24 Pan, K. Z. *et al.* Inhibition of mRNA translation extends lifespan in *Caenorhabditis*  
582 *elegans*. *Aging Cell* **6**, 111-119, doi:10.1111/j.1474-9726.2006.00266.x (2007).
- 583 25 Hansen, M. *et al.* Lifespan extension by conditions that inhibit translation in  
584 *Caenorhabditis elegans*. *Aging Cell* **6**, 95-110, doi:10.1111/j.1474-9726.2006.00267.x  
585 (2007).
- 586 26 Essers, P. *et al.* Reduced insulin/insulin-like growth factor signaling decreases  
587 translation in *Drosophila* and mice. *Scientific reports* **6**, 30290, doi:10.1038/srep30290  
588 (2016).
- 589 27 Karunadharm, P. P. *et al.* Subacute calorie restriction and rapamycin discordantly  
590 alter mouse liver proteome homeostasis and reverse aging effects. *Aging Cell* **14**, 547-  
591 557, doi:10.1111/accel.12317 (2015).
- 592 28 McColl, G. *et al.* Insulin-like signaling determines survival during stress via  
593 posttranscriptional mechanisms in *C. elegans*. *Cell metabolism* **12**, 260-272,  
594 doi:10.1016/j.cmet.2010.08.004 (2010).
- 595 29 Li, W., Li, X. & Miller, R. A. ATF4 activity: a common feature shared by many kinds of  
596 slow-aging mice. *Aging Cell* **13**, 1012-1018, doi:10.1111/accel.12264 (2014).
- 597 30 Salminen, A., Kaarniranta, K. & Kauppinen, A. Integrated stress response stimulates  
598 FGF21 expression: Systemic enhancer of longevity. *Cell Signal* **40**, 10-21,  
599 doi:10.1016/j.cellsig.2017.08.009 (2017).
- 600 31 Steffen, K. K. *et al.* Yeast life span extension by depletion of 60s ribosomal subunits is  
601 mediated by Gcn4. *Cell* **133**, 292-302, doi:10.1016/j.cell.2008.02.037 (2008).
- 602 32 Krzyzosiak, A. *et al.* Target-Based Discovery of an Inhibitor of the Regulatory  
603 Phosphatase PPP1R15B. *Cell* **174**, 1216-1228.e1219, doi:10.1016/j.cell.2018.06.030  
604 (2018).
- 605 33 Albert, A. E. *et al.* Adaptive Protein Translation by the Integrated Stress Response  
606 Maintains the Proliferative and Migratory Capacity of Lung Adenocarcinoma Cells.

- 607 *Molecular cancer research : MCR* **17**, 2343-2355, doi:10.1158/1541-7786.Mcr-19-0245  
608 (2019).
- 609 34 Cnop, M., Toivonen, S., Igoillo-Esteve, M. & Salpea, P. Endoplasmic reticulum stress  
610 and eIF2alpha phosphorylation: The Achilles heel of pancreatic beta cells. *Molecular*  
611 *metabolism* **6**, 1024-1039, doi:10.1016/j.molmet.2017.06.001 (2017).
- 612 35 Ma, T. *et al.* Suppression of eIF2alpha kinases alleviates Alzheimer's disease-related  
613 plasticity and memory deficits. *Nature neuroscience* **16**, 1299-1305,  
614 doi:10.1038/nn.3486 (2013).
- 615 36 Chou, A. *et al.* Inhibition of the integrated stress response reverses cognitive deficits  
616 after traumatic brain injury. *Proc Natl Acad Sci U S A* **114**, E6420-e6426,  
617 doi:10.1073/pnas.1707661114 (2017).
- 618 37 Zhu, P. J. *et al.* Activation of the ISR mediates the behavioral and neurophysiological  
619 abnormalities in Down syndrome. *Science* **366**, 843-849, doi:10.1126/science.aaw5185  
620 (2019).
- 621 38 Halliday, M. *et al.* Partial restoration of protein synthesis rates by the small molecule  
622 ISRIB prevents neurodegeneration without pancreatic toxicity. *Cell death & disease* **6**,  
623 e1672, doi:10.1038/cddis.2015.49 (2015).
- 624 39 Costa-Mattioli, M. *et al.* eIF2alpha phosphorylation bidirectionally regulates the switch  
625 from short- to long-term synaptic plasticity and memory. *Cell* **129**, 195-206,  
626 doi:10.1016/j.cell.2007.01.050 (2007).
- 627 40 Sidrauski, C. *et al.* Pharmacological brake-release of mRNA translation enhances  
628 cognitive memory. *eLife* **2**, e00498, doi:10.7554/eLife.00498 (2013).
- 629 41 Sekine, Y. *et al.* Stress responses. Mutations in a translation initiation factor identify  
630 the target of a memory-enhancing compound. *Science* **348**, 1027-1030,  
631 doi:10.1126/science.aaa6986 (2015).
- 632 42 Sidrauski, C. *et al.* Pharmacological dimerization and activation of the exchange factor  
633 eIF2B antagonizes the integrated stress response. *eLife* **4**, e07314,  
634 doi:10.7554/eLife.07314 (2015).
- 635 43 Brenner, S. The genetics of *Caenorhabditis elegans*. *Genetics* **77**, 71-94 (1974).
- 636 44 Minevich, G., Park, D. S., Blankenberg, D., Poole, R. J. & Hobert, O. CloudMap: a cloud-  
637 based pipeline for analysis of mutant genome sequences. *Genetics* **192**, 1249-1269,  
638 doi:10.1534/genetics.112.144204 (2012).
- 639 45 Kamath, R. S. *et al.* Systematic functional analysis of the *Caenorhabditis elegans*  
640 genome using RNAi. *Nature* **421**, 231-237, doi:10.1038/nature01278 (2003).
- 641 46 Rual, J. F. *et al.* Toward improving *Caenorhabditis elegans* phenome mapping with an  
642 ORFeome-based RNAi library. *Genome research* **14**, 2162-2168,  
643 doi:10.1101/gr.2505604 (2004).
- 644 47 Ding, X. C. & Grosshans, H. Repression of *C. elegans* microRNA targets at the initiation  
645 level of translation requires GW182 proteins. *The EMBO journal* **28**, 213-222,  
646 doi:10.1038/emboj.2008.275 (2009).
- 647 48 Kim, D., Langmead, B. & Salzberg, S. L. HISAT: a fast spliced aligner with low memory  
648 requirements. *Nature methods* **12**, 357-360, doi:10.1038/nmeth.3317 (2015).
- 649 49 Pertea, M. *et al.* StringTie enables improved reconstruction of a transcriptome from  
650 RNA-seq reads. *Nature biotechnology* **33**, 290-295, doi:10.1038/nbt.3122 (2015).
- 651 50 Trapnell, C. *et al.* Differential analysis of gene regulation at transcript resolution with  
652 RNA-seq. *Nature biotechnology* **31**, 46-53, doi:10.1038/nbt.2450 (2013).

- 653 51 Trapnell, C. *et al.* Transcript assembly and quantification by RNA-Seq reveals  
654 unannotated transcripts and isoform switching during cell differentiation. *Nature*  
655 *biotechnology* **28**, 511-515, doi:10.1038/nbt.1621 (2010).
- 656 52 Fresno, C. & Fernandez, E. A. RDAVIDWebService: a versatile R interface to DAVID.  
657 *Bioinformatics (Oxford, England)* **29**, 2810-2811, doi:10.1093/bioinformatics/btt487  
658 (2013).  
659

660 **Acknowledgements:**

661 We thank all Denzel laboratory members for helpful discussions. We thank the  
662 Caenorhabditis Genetics Center (CGC) and Dr. T. Keith Blackwell for worm strains.  
663 We thank F. Metge, S. Templer and J. Boucas and all members of the bioinformatics  
664 core facility at MPI AGE. We thank the Cologne Center for Genomics for sequencing.  
665 **Funding:** L.E.W. was supported by the Cologne Graduate School of Ageing Research.  
666 This work was supported by the European Commission (ERC-2014-StG-640254-  
667 MetAGEn).

668 **Author contributions:**

669 M.D., L.E.W., and M.S.D. conceived the study. All experiments were performed by  
670 M.D., L.E.W., and R.B. The manuscript was written and edited by M.D., L.E.W., and  
671 M.S.D.

672 **Data availability:**

673 The RNA sequencing data in this publication have been deposited in NCBI's Gene  
674 Expression Omnibus and are accessible through GEO Series accession number  
675 GSE144607 (<https://www.ncbi.nlm.nih.gov/geo/query/acc.cgi?acc=GSE144607>). All  
676 other data is available in the main text or the supplementary materials.

677 **Competing interests:**

678 The authors declare no competing interests.

679 **Materials & Correspondence.**

680 Correspondence and material requests should be addressed to  
681 [martin.denzel@age.mpg.de](mailto:martin.denzel@age.mpg.de)



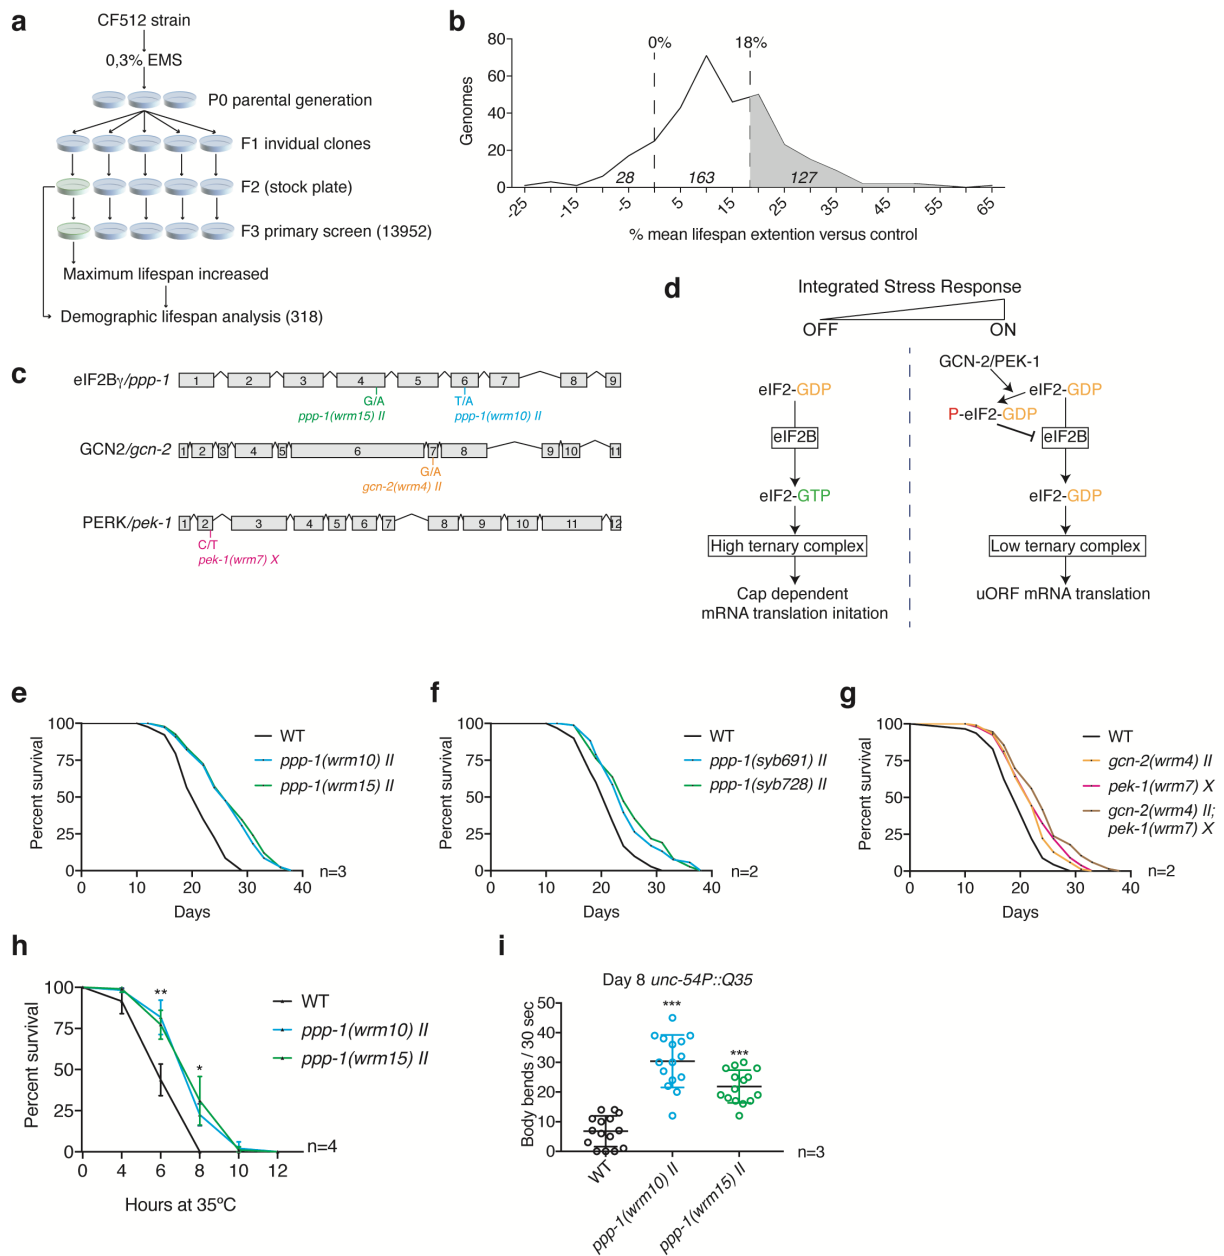

682

683 **Fig. 1 | Unbiased forward longevity screen in *C. elegans* identifies mutations in**  
 684 **ISR components.** **a**, Screening strategy. **b**, Percent of mean lifespan extension  
 685 (compared to temperature sensitive sterile CF512 control) as a function of the number  
 686 of genomes tested. **c**, Schematic representation of identified ISR genes and  
 687 corresponding longevity alleles. **d**, Cartoon depiction of the ISR. **e**, Survival of  
 688 outcrossed *ppp-1(wrm10)* and *(wrm15)* mutants compared to WT controls (n=3). **f**,  
 689 Survival of CRISPR/Cas9-generated *ppp-1* alleles (*syb691*) and (*syb728*) compared  
 690 to WT controls (n=2). *syb691* corresponds to *wrm10* and *syb728* to *wrm15*. **g**, Survival  
 691 of outcrossed *gcn-2(wrm4)*, *pek-1(wrm7)* and double *gcn-2(wrm4);pek-1(wrm7)*  
 692 mutants compared to WT controls (n=2). **h**, Thermotolerance assays of day 1 *ppp-1*

693 mutant worms show significantly increased survival during heat stress compared to  
694 WT (error bars represent means  $\pm$ SD, two-way ANOVA Dunnett's post hoc test with  
695 \*\* $p < 0.01$  and \* $p < 0.05$  versus WT controls;  $n=4$ ). i, Motility assays using day 8 WT and  
696 *ppp-1* mutants with *unc-54P*-driven muscle-specific expression of polyQ35-YFP fusion  
697 protein (error bars represent means  $\pm$ SD, one-way ANOVA Dunnett's post hoc test  
698 with \*\*\* $p < 0.001$  versus WT controls;  $n=3$ ). See Extended Data Table 1 for lifespan  
699 statistics. See Extended Data Table 2 for statistics on thermotolerance assays.

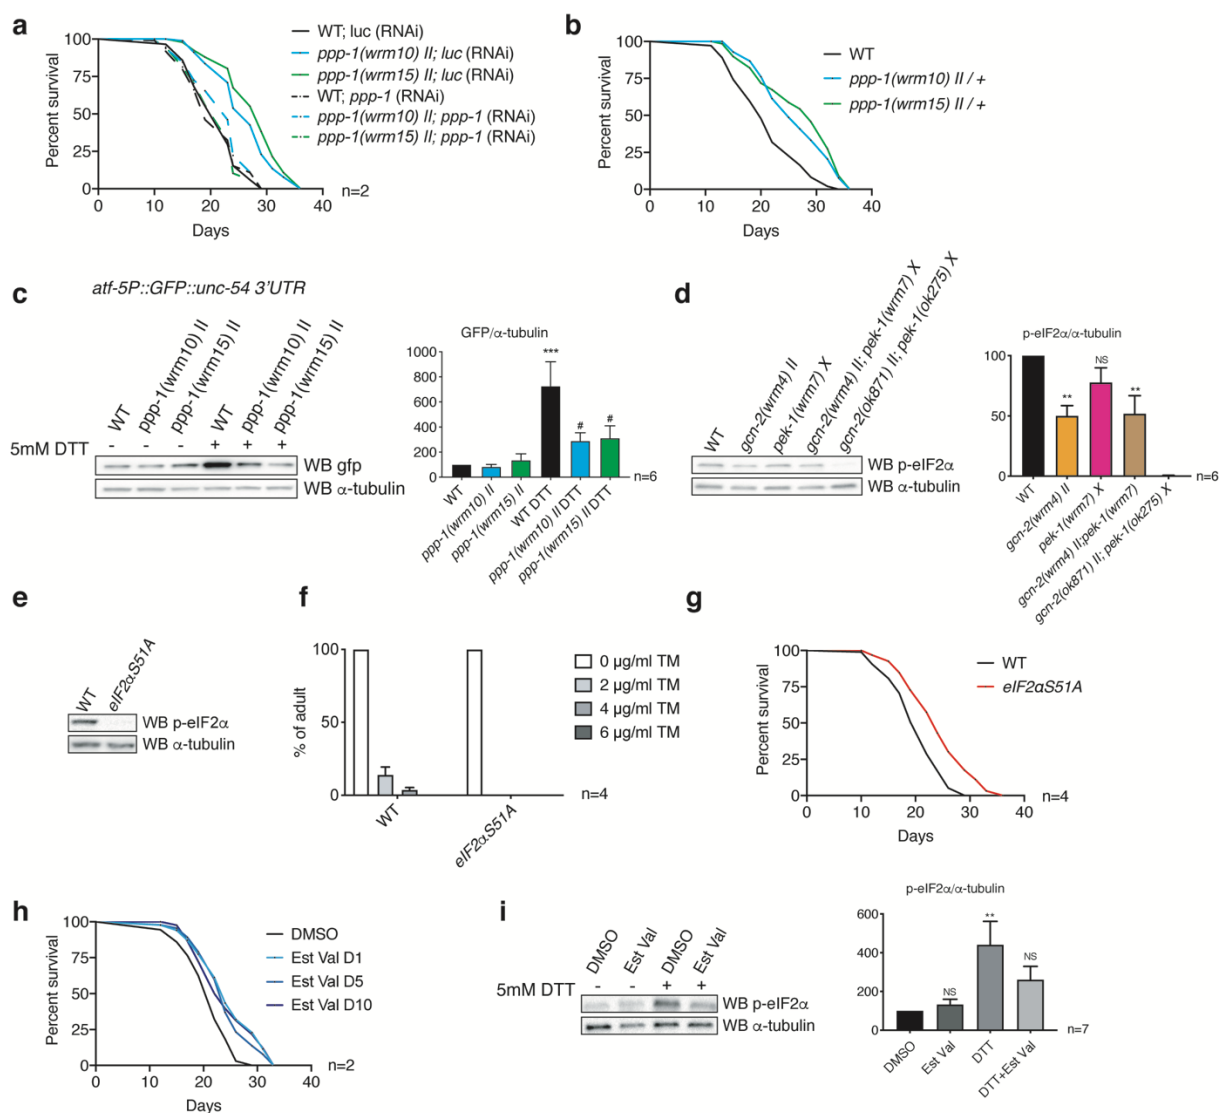

700

701

702 **Fig. 2 | ISR inhibition mediated by Gcn(-) mutations extends *C. elegans* lifespan.**

703 **a**, Survival of WT and *ppp-1* mutants upon RNAi treatment targeting *ppp-1* and control

704 *luciferase (luc)* (n=2). **b**, Survival of heterozygous *ppp-1* mutants compared to WT

705 control animals. **c**, Representative Western blot of day 1 WT and *ppp-1* mutants in the

706 *atf-5P::GFP::unc-54* 3'UTR reporter background treated with 5 mM DTT for 2 hours,

707 using anti-GFP and anti- $\alpha$ -tubulin antibodies. GFP levels were normalized to  $\alpha$ -tubulin

708 (error bars represent means +SEM, one-way ANOVA Tukey's post hoc test,

709 \*\*\*p<0.001 versus WT(-DTT), #p<0.05 versus WT(+DTT); n=6). **d**, Representative

710 Western blot of day 1 worms of indicated genotypes detecting phospho-eIF2 $\alpha$  (Ser51)

711 and  $\alpha$ -tubulin. Levels of phospho-eIF2 $\alpha$  were normalized to  $\alpha$ -tubulin (error bars

712 represent means +SEM, one-way ANOVA Dunnett's post hoc test, \*\*p<0.01 versus

713 WT, NS=not significant versus WT; n=6). **e**, Western blot of day 1 *eIF2 $\alpha$ S51A* mutants

714 using anti-phospho-eIF2 $\alpha$  (Ser51) and anti- $\alpha$ -tubulin antibodies. **f**, Developmental

715 tunicamycin (TM) resistance assay of WT and *eIF2 $\alpha$ S51A* mutants treated with  
716 indicated TM concentrations (error bars represent means +SEM, two-way ANOVA  
717 Sidak's post hoc test; n=4). **g**, Survival of *eIF2 $\alpha$ S51A* mutants compared to WT control  
718 animals (n=4). **h**, Survival of WT worms treated with 1% DMSO (control) or 20 $\mu$ M  
719 Estradiol Valerate (Est Val) from day 1 (D1), day 5 (D5) or day 10 (D10) (n=2). **i**,  
720 Representative western blot of day 1 worms treated with 1% DMSO (control) or 20 $\mu$ M  
721 Est Val. Worms were incubated without (-) or with 5mM DTT (+) for 2h. Levels of  
722 phospho-eIF2 $\alpha$  (Ser51) were normalized to  $\alpha$ -tubulin (error bars represent means  
723 +SEM, one-way ANOVA Dunnett's post hoc test, \*\*p<0.01 versus WT(-DTT), NS=not  
724 significant versus WT(-DTT); n=6). See Extended Data Table 1 for lifespan statistics.

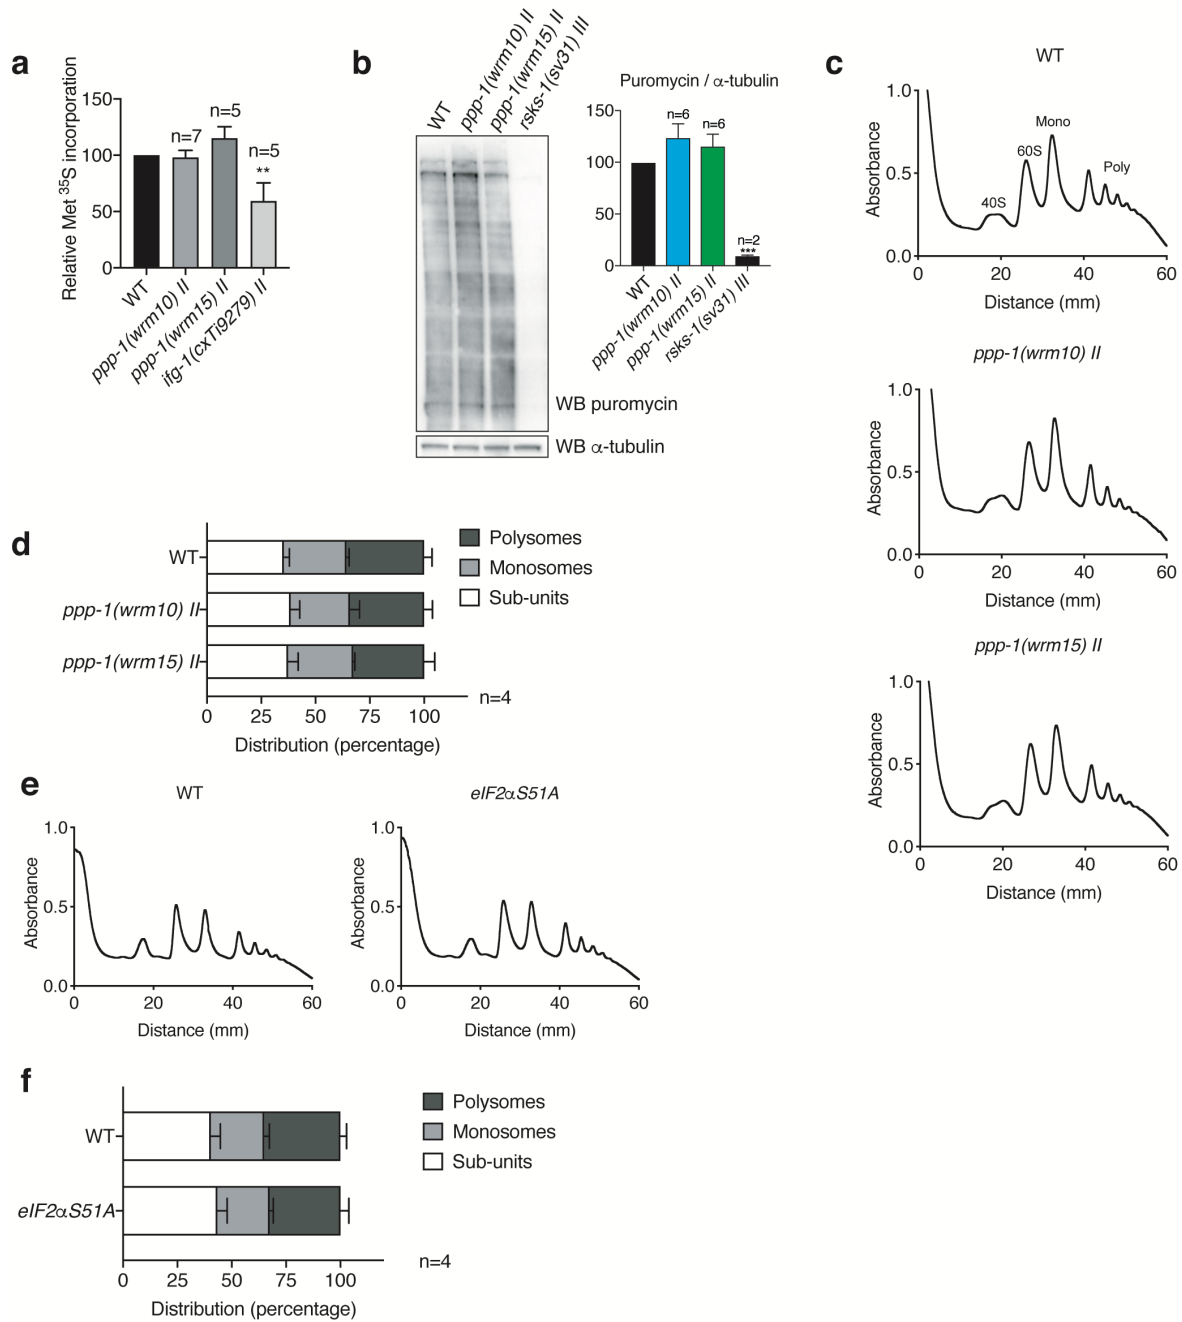

725

726

727 **Fig. 3 | Gcn(-) mutants show no changes in overall protein biosynthesis. a**, <sup>35</sup>S-

728 methionine labelling of day 1 WT worms, *ppp-1* mutants and control *ifg-1(cxTi9272)*

729 mutants (error bars represent means +SEM, one-way ANOVA Dunnett's post hoc test

730 with \*\*p<0.01 versus WT; biological replicates (n) as indicated in the figure). **b**,

731 Puromycin incorporation followed by Western blot analysis using antibodies detecting

732 puromycin and  $\alpha$ -tubulin in day 1 WT animals, *ppp-1* mutants, and control *rsks-1(sv31)*

733 mutants (error bars represent means +SEM, one-way ANOVA Dunnett's post hoc test

734 with \*\*\*p<0.001 versus WT; biological replicates (n) as indicated in the figure). **c, d**,

735 Polysome profiling and quantification of day 1 WT and *ppp-1* animals. Quantification

736 represents the relative abundance of ribosomal subunits (40S, 60S), monosomes  
737 (mono) and polysomes (poly) (error bars represent means +SD, two-way ANOVA  
738 Dunnett's post hoc test; n=4). **e, f**, Polysome profiling and quantification of day 1 WT  
739 worms and *eIF2 $\alpha$ S51A* mutants (error bars represent means +SD, two-way ANOVA  
740 Dunnett's post hoc test; n=4).

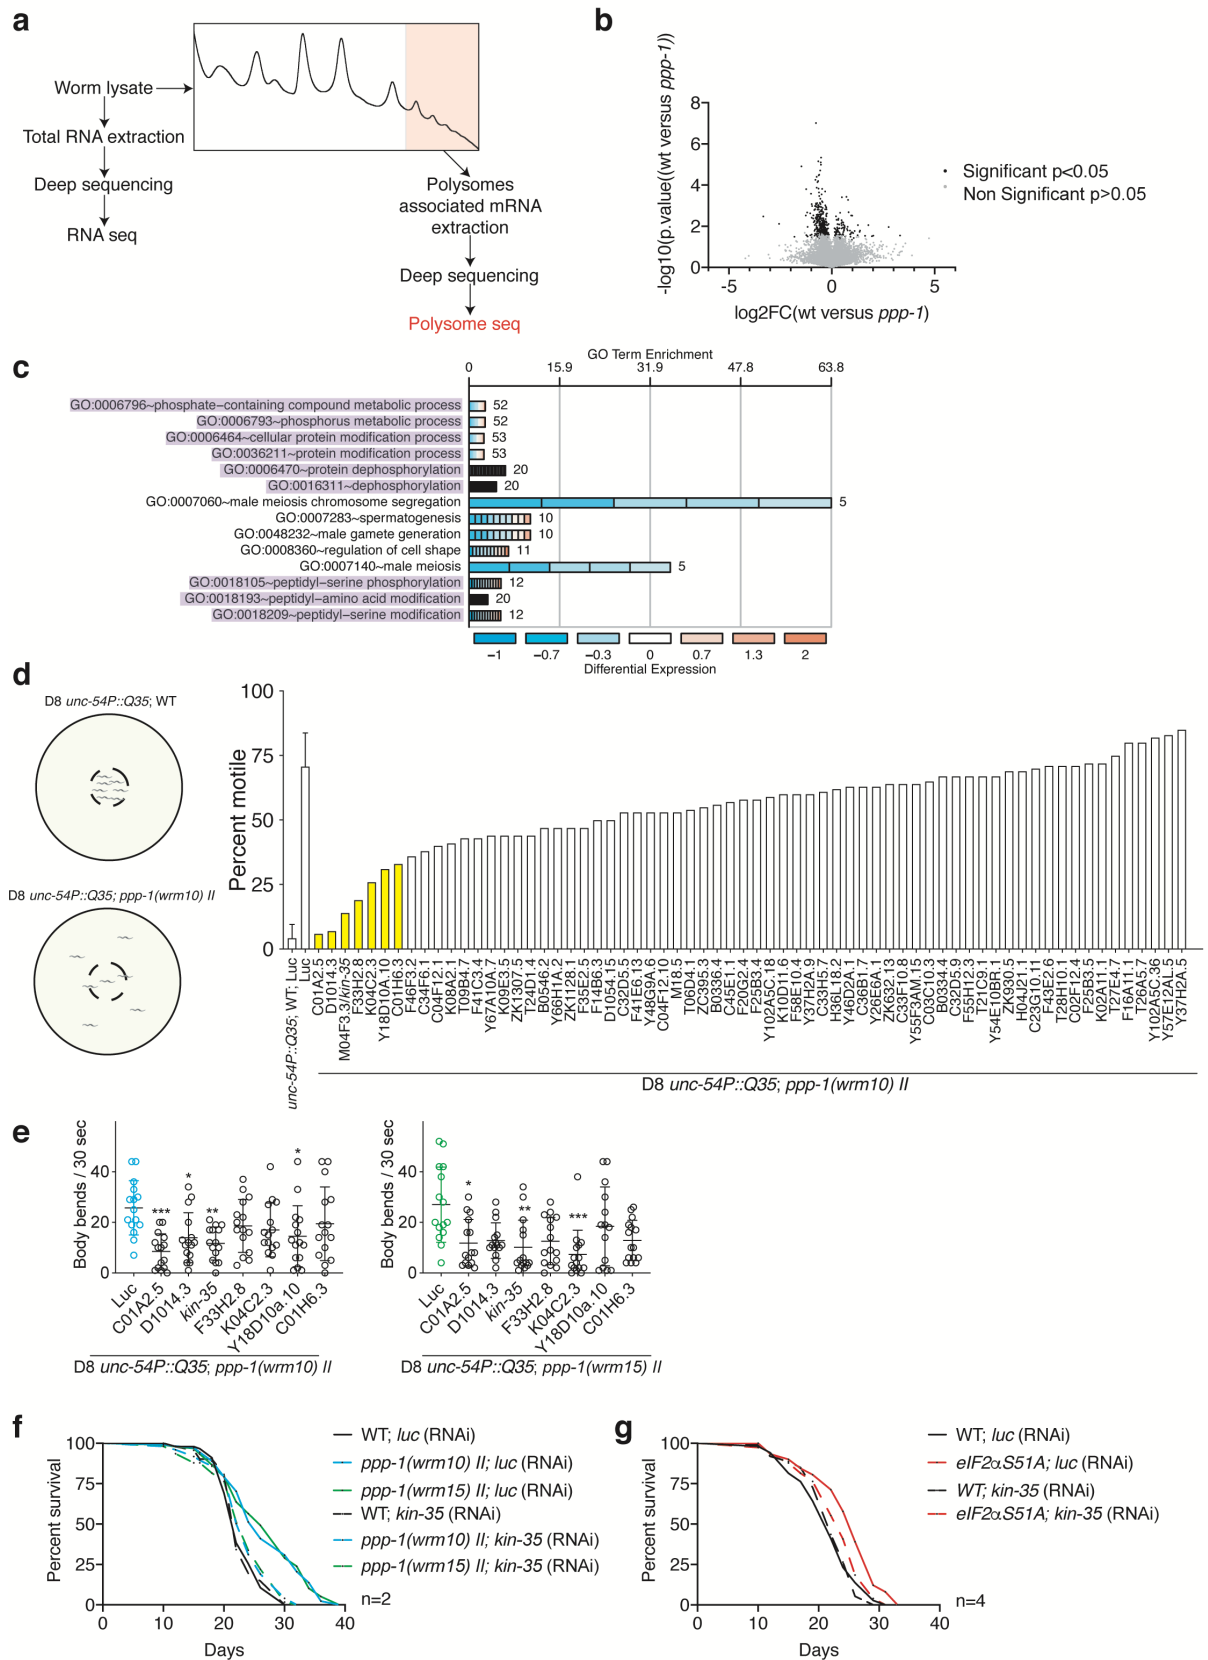

741

742

743 **Fig. 4 | *kin-35* translation is required for longevity of Gcn(-) mutants.** **a**, Polysome

744 sequencing strategy. **b**, Volcano plot of polysome-associated mRNAs normalized to

745 total mRNA levels between WT and *ppp-1* mutants. All displayed mRNAs were found

746 in both *ppp-1* mutants. Mean p-values and mean log-2 fold change of both *ppp-1*  
747 mutants were used (Student's t-test, significance is reached for  $p < 0.05$ ). FC = fold  
748 change. The full dataset can be found in Extended Data Table 3. **c**, DAVID gene  
749 ontology (GO) analysis of significantly changed mRNAs shown in (B). Processes  
750 involved in phosphorylation are highlighted in purple. **d**, Selective RNAi screen for  
751 suppressors of *ppp-1(wrm10)* polyQ35 motility. For more reliability, assays of WT  
752 polyQ35 and *ppp-1(wrm10)* polyQ35 on *luc* RNAi were performed four times (error  
753 bars represent means  $\pm$ SD). **e**, Motility assays of day 8 WT polyQ35 and *ppp-1*  
754 polyQ35 mutants after indicated RNAi treatments (error bars represent means  $\pm$ SD,  
755 one-way ANOVA Dunnett's post hoc test with \* $p < 0.05$ , \*\* $p < 0.01$  and \*\*\* $p < 0.001$  versus  
756 *luc* control). **f**, Survival of WT and *ppp-1* mutants upon *kin-35* and control *luc* RNAi  
757 knockdown (n=2). **g**, Survival of WT and *eIF2 $\alpha$ S51A* mutants upon RNAi knockdown  
758 of *kin-35* and control *luc* (n=4). See Extended Data Table 1 for lifespan statistics.
